# Supplementary material
Source: HighWire-hosted journal article supplement (https://cmajopen-stage.highwire.org/highwire/filestream/88406/field_highwire_adjunct_files/2/open-2021-0113-3-at.pdf)
Supplement: open-2021-0113-3-at.pdf [file open-2021-0113-3-at.pdf]

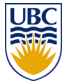

### **Appendix 3: Copy of English version of survey**

#### **Section 1: Introduction**

Thank you for agreeing to take part in this study. The survey is structured in 5 sections. Please press next to proceed.

#### **+ Click to learn how to use the different buttons on each page**

- To go to the next page of the survey, click on the blue [Next] button at the bottom right hand side of each page.
- Click on the white [Back] button at the bottom left hand side of each page to go back to the previous page.
- Click on [Menu] at the top right hand side of the page to see the different sections of this survey. Use this to skip between sections you have already completed.



## Section 2: About you and your health

The first 8 questions are demographic questions. The following 9 questions are from the **Veterans Rand 12 Item Health Survey (VR-12)**. It asks for your views about your health. All questions are multiple choice. There are no 'correct' or 'incorrect' answers. It is important that you answer according to your own feelings and opinions, rather than how you think most people will answer.

Please answer all the questions. If you are unsure how to answer a question, please give the best answer you can. Some questions may look like others but each one is different. Please answer each question independently.

---

1. In which province or territory do you live?
  - ☐ Alberta
  - ☐ British Columbia
  - ☐ Manitoba
  - ☐ New Brunswick
  - ☐ Newfoundland and Labrador
  - ☐ Northwest Territories
  - ☐ Nova Scotia
  - ☐ Nunavut
  - ☐ Ontario
  - ☐ Prince Edward Island
  - ☐ Quebec
  - ☐ Saskatchewan
  - ☐ Yukon
2. What is your gender?
  - ☐ Male
  - ☐ Female
  - ☐ Other (please specify):
3. What is your age?
4. What is your marital status?
  - ☐ Never legally married
  - ☐ Legally married (and not separated)
  - ☐ Separated, but still legally married
  - ☐ Divorced
  - ☐ Widowed
  - ☐ Living with a common-law partner
5. What is the highest grade or level of school that you have completed?
  - ☐ No certificate, diploma or degree
  - ☐ Secondary (high) school diploma or equivalency certificate
  - ☐ Apprenticeship or trades certificate or diploma
  - ☐ College, CEGEP or other non-university certificate or diploma
  - ☐ University certificate or diploma below bachelor level
  - ☐ University certificate, diploma or degree at bachelor level or above

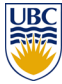

6. The following question will help us better understand the communities represented in this survey. The list below is ordered by the most common ethnicities in Canada. Do you consider yourself to be...? (Select all that apply.)

- ☐ White
- ☐ South Asian (e.g., East Indian, Pakistani, Sri Lankan, etc.)
- ☐ Chinese
- ☐ First Nations (North American Indian)
- ☐ Southeast Asian (e.g., Vietnamese, Cambodian, Malaysian, Laotian, etc.)
- ☐ West Asian (e.g., Iranian, Afghan, etc.)
- ☐ Filipino
- ☐ Latin American
- ☐ Métis
- ☐ Korean
- ☐ Japanese
- ☐ Arab
- ☐ Inuit
- ☐ Black
- ☐ Indigenous / Aboriginal (not included elsewhere)
- ☐ Other (please specify)

7. What is your total household income (before tax)?

- ☐ \$0 - \$19,999
- ☐ \$20,000 - \$49,999
- ☐ \$50,000 - \$99,999
- ☐ \$100,000 - \$149,999
- ☐ \$150,000+

8. Do you have any of the following health conditions now? (Select all that apply)

- ☐ Anemia or blood disease
- ☐ Back pain
- ☐ Cancer
- ☐ Depression
- ☐ Diabetes
- ☐ Heart disease
- ☐ High blood pressure
- ☐ Kidney disease
- ☐ Liver disease
- ☐ Lung disease
- ☐ Osteoarthritis, degenerative arthritis
- ☐ Rheumatoid arthritis
- ☐ Ulcer or stomach disease
- ☐ Other (please specify)



The following questions are from the **Veterans Rand 12 Item Health Survey (VR-12)**. We will first ask questions about yourself, but these questions will be used as descriptions later in the survey so please read each carefully.

9. In general, would you say your health is:

- ☐ Excellent
- ☐ Very good
- ☐ Good
- ☐ Fair
- ☐ Poor

10. The following questions are about activities you might do during a typical day. Does **your health now limit you** in these activities? If so, how much?

a. **Moderate activities**, such as moving a table, pushing a vacuum cleaner, bowling or playing golf?

- ☐ Yes, limited a lot
- ☐ Yes, limited a little
- ☐ No, not limited at all

b. Climbing **several** flights of stairs?

- ☐ Yes, limited a lot
- ☐ Yes, limited a little
- ☐ No, not limited at all

11. During the past 4 weeks, have you had any of the following problems with your work or other regular daily activities **as a result of your physical health**?

a. **Accomplished less** than you would like.

- ☐ No, none of the time
- ☐ Yes, a little of the time
- ☐ Yes, some of the time
- ☐ Yes, most of the time
- ☐ Yes, all of the time

b. Were limited in the **kind** of work or other activities.

- ☐ No, none of the time
- ☐ Yes, a little of the time
- ☐ Yes, some of the time
- ☐ Yes, most of the time
- ☐ Yes, all of the time

12. During the past 4 weeks, have you had any of the following problems with your work or other regular daily activities **as a result of any emotional problems** (such as feeling depressed or anxious)?

a. **Accomplished less** than you like.



- ☐ No, none of the time
- ☐ Yes, a little of the time
- ☐ Yes, some of the time
- ☐ Yes, most of the time
- ☐ Yes, all of the time

b. Didn't do work or other activities as **carefully** as usual.

- ☐ No, none of the time
- ☐ Yes, a little of the time
- ☐ Yes, some of the time
- ☐ Yes, most of the time
- ☐ Yes, all of the time

13. During the past 4 weeks, how much did **pain** interfere with your normal work (including both work outside the home and housework)?

- ☐ Not at all
- ☐ A little bit
- ☐ Moderately
- ☐ Quite a bit
- ☐ Extremely

These questions are about how you feel and how things have been with you during the past 4 weeks. For each question, please give the one answer that comes closest to the way you have been feeling.

14. How much of the time during the past 4 weeks:

a. Have you felt **calm and peaceful**?

- ☐ All of the time
- ☐ Most of the time
- ☐ A good bit of the time
- ☐ Some of the time
- ☐ A little of the time
- ☐ None of the time

b. Did you have **a lot of energy**?

- ☐ All of the time
- ☐ Most of the time
- ☐ A good bit of the time
- ☐ Some of the time
- ☐ A little of the time
- ☐ None of the time

c. Have you felt **downhearted and blue**?



- ☐ All of the time
- ☐ Most of the time
- ☐ A good bit of the time
- ☐ Some of the time
- ☐ A little of the time
- ☐ None of the time

15. During the past 4 weeks, how much of the time has your **physical health or emotional problems** interfered with your social activities (like visiting with friends, relatives, etc.)?

- ☐ All of the time
- ☐ Most of the time
- ☐ Some of the time
- ☐ A little of the time
- ☐ None of the time

Now we'd like to ask you some questions about how your health may have changed.

16. Compared to one year ago, how would you rate your **physical health** in general now?

- ☐ Much better
- ☐ Slightly better
- ☐ About the same
- ☐ Slightly worse
- ☐ Much worse

17. Compared to one year ago, how would you rate your **emotional problems** (such as feeling anxious, depressed or irritable) **now**?

- ☐ Much better
- ☐ Slightly better
- ☐ About the same
- ☐ Slightly worse
- ☐ Much worse



## **RANDOMIZED TO DIFFERENT SURVEYS**

### **DCE SURVEY**

#### **Section 3: Choosing health states**

The next questions will show you hypothetical health states. We will use the term 'health state' to describe how you are doing physically and how you are feeling overall. It includes different aspects of your health, such as your emotional well-being, your physical well-being, your ability to do daily tasks, your social well-being, and your ability to do things for fun.

Each question will show you two health states. Imagine that you have to choose between these two health states. Both health states will start right now and you will live in the health state you choose until the end of your life. How long you will live is different for each health state. At the end of that period of time, you will die. Please imagine that death will be quick and pain free, and that your health is exactly what is described in the health state. You do not have any other health problems.

For each question, we would like to know which of the two health states you prefer.

We will start with a short practice exercise. There will be pop-up instructions to help guide you through each step.



Question 1 of 11 (warm up)

|                                                    | Health State A           | Health State B           |
|----------------------------------------------------|--------------------------|--------------------------|
| Live for __ with the following and then you die... | 7 years                  | 4 years                  |
| Feel downhearted and blue...                       | none of the time         | some of the time         |
| Have a lot of energy...                            | a little of the time     | all of the time          |
| Feel calm and peaceful...                          | some of the time         | none of the time         |
| Which do you prefer?                               | <input type="checkbox"/> | <input type="checkbox"/> |

<<POP UP TEXT>>

1. This question describes two health states (A and B).
2. The 'characteristics' of the health state are described here. These 'characteristics' come from the questions you just completed.
3. The 'level' of each characteristic is described here. The 'levels' are the response options from the questions you just completed. This level corresponds to option A.
4. The differences between the two states are highlighted in yellow. Worse levels are darker yellow.
5. We want you to imagine you have to choose between A and B.
6. Please select the health state you prefer



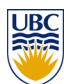

## Question 2 of 11

|                                                                       | Health State A           | Health State B           |
|-----------------------------------------------------------------------|--------------------------|--------------------------|
| Live for ___ with the following and then you die...                   | 7 years                  | 4 years                  |
| Feel downhearted and blue...                                          | none of the time         | some of the time         |
| Have a lot of energy...                                               | a little of the time     | all of the time          |
| Feel calm and peaceful...                                             | some of the time         | none of the time         |
| Accomplish less than you would like due to your physical health...    | all of the time          | most of the time         |
| Health interferes with social activities...                           | most of the time         | most of the time         |
| Moderate activities are...                                            | limited a lot            | limited a lot            |
| Accomplish less than you would like due to your emotional problems... | most of the time         | most of the time         |
| Pain interferes with your normal work...                              | moderately               | moderately               |
| Which do you prefer?                                                  | <input type="checkbox"/> | <input type="checkbox"/> |

<<POP UP TEXT>>

1. This question is the same as the question that you just answered except there are 9 characteristics. The first 4 characteristics are the same, and 5 new characteristics have been added.
2. The **characteristics that are different** between A and B will always **be near the top**. The order will never change.
3. The characteristics that stay the same between A and B will never be shaded.
4. You chose 'A', this means that you thought Health State A was preferred to B. Compared to B, in Health State A you: would **have a lot of energy less often and accomplish less than you would like due to physical health all of the time**. However you would **live 3 years more and would not feel downhearted and blue and feel calm and peaceful some of the time**. All other aspects of health were the same for A and B.
5. If you have any doubts about your answers, you can reset the question by hitting this button.

## Question 3-11

<<REPEAT as above but without pop ups and with different levels and order according to block and experimental design.>>



#### Section 4: Further questions about your health

The questions in this section are from the **EQ-5D-5L** and **PROMIS 10 Global Health Survey**. All questions are multiple choice. There are no 'correct' or 'incorrect' answers. It is important that you answer according to your own feelings and opinions, rather than how you think most people will answer.

Please answer all the questions. If you are unsure how to answer a question, please give the best answer you can. Some questions may look like others but each one is different. Please answer each question independently.

<<EQ-5D questionnaire here>>.

---



---

The following 10 questions are from the **Patient Reported Outcome Measurement Information System (PROMIS 10) Global Health Survey**.

<<PROMIS 10 Questionnaire here>>

---



## Section 5: Thank you

### **Thank you for completing this survey!**

Your responses will help us learn about what the public thinks about different states of health, and which ones they would prefer to live in. This information will help us understand the value of health improvements that new drugs or interventions bring about.
